# Supplementary material for: QTL Mapping for Gummy Stem Blight Resistance in Watermelon (Citrullus spp.)
Source: MDPI journal article supplement (doi:10.3390/plants10030500), 2021-03-08
Supplement: s1 [file s1]

## **QTL Mapping for Gummy Stem Blight Resistance in Watermelon (*Citrullus* spp.)**

Eun Su Lee <sup>1</sup>, Do-Sun Kim <sup>1</sup>, Sang Gyu Kim <sup>1</sup>, Yun-Chan Huh <sup>2</sup>, Chang-Gi Back <sup>3</sup>, Ye-Rin Lee <sup>1</sup>,  
Muhammad Irfan Siddique <sup>1</sup>, Koeun Han <sup>1</sup>, Hye-Eun Lee <sup>1,\*</sup> and Jundae Lee <sup>4,\*</sup>

\*Correspondence: helee72@korea.kr; Tel.: +82-063-238-6674; Fax: +82-063-238-6605 (H.-E.L.); ajfall@jbnu.ac.kr;  
Tel.: +82-063-270-2560 (J.L.)

## Supplementary Material

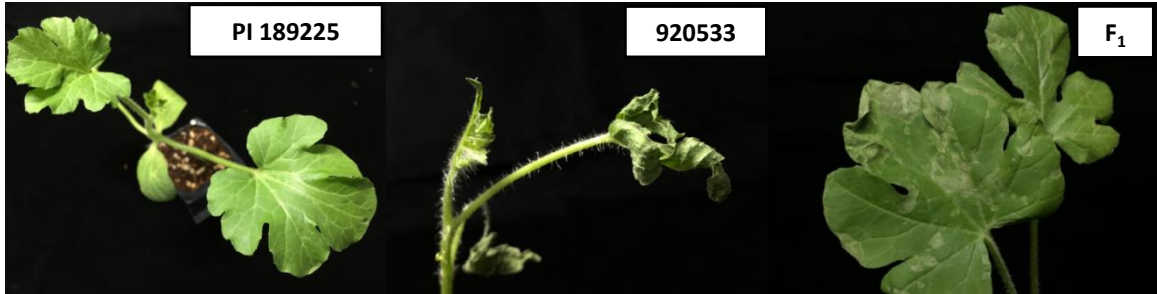

**Figure S1.** Gummy stem blight (GSB) reactions on the leaves of resistant parent 'PI 189225', susceptible parent '920533', and  $F_1$ .

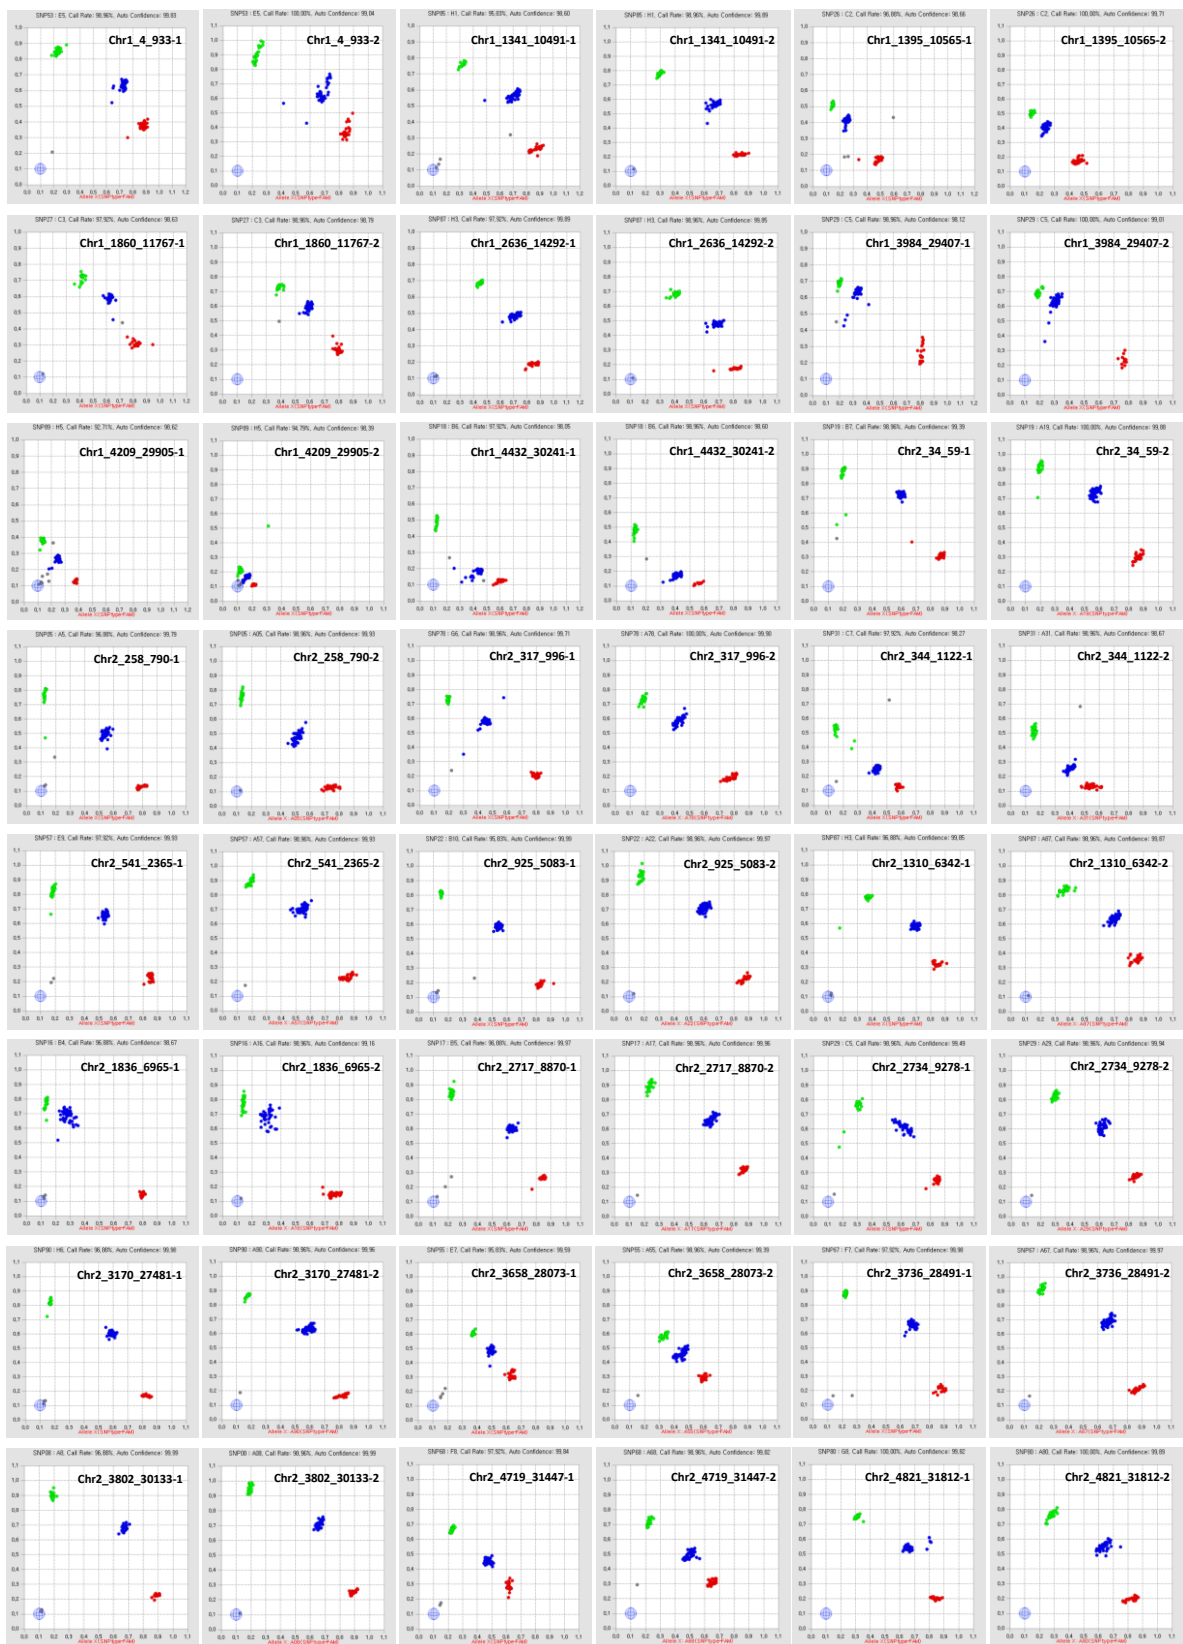

**Figure S2.** SNP genotyping using Fluidigm® SNP Type™ assays for two parents,  $F_1$ , and 178 individuals of the  $F_2$  population. chr1\_4\_933-1 and chr1\_4\_933-2 represent scatter plotting of a chr1\_4\_933 assays for  $F_2$  individuals from 1 to 89 and from 90 to 178, respectively.

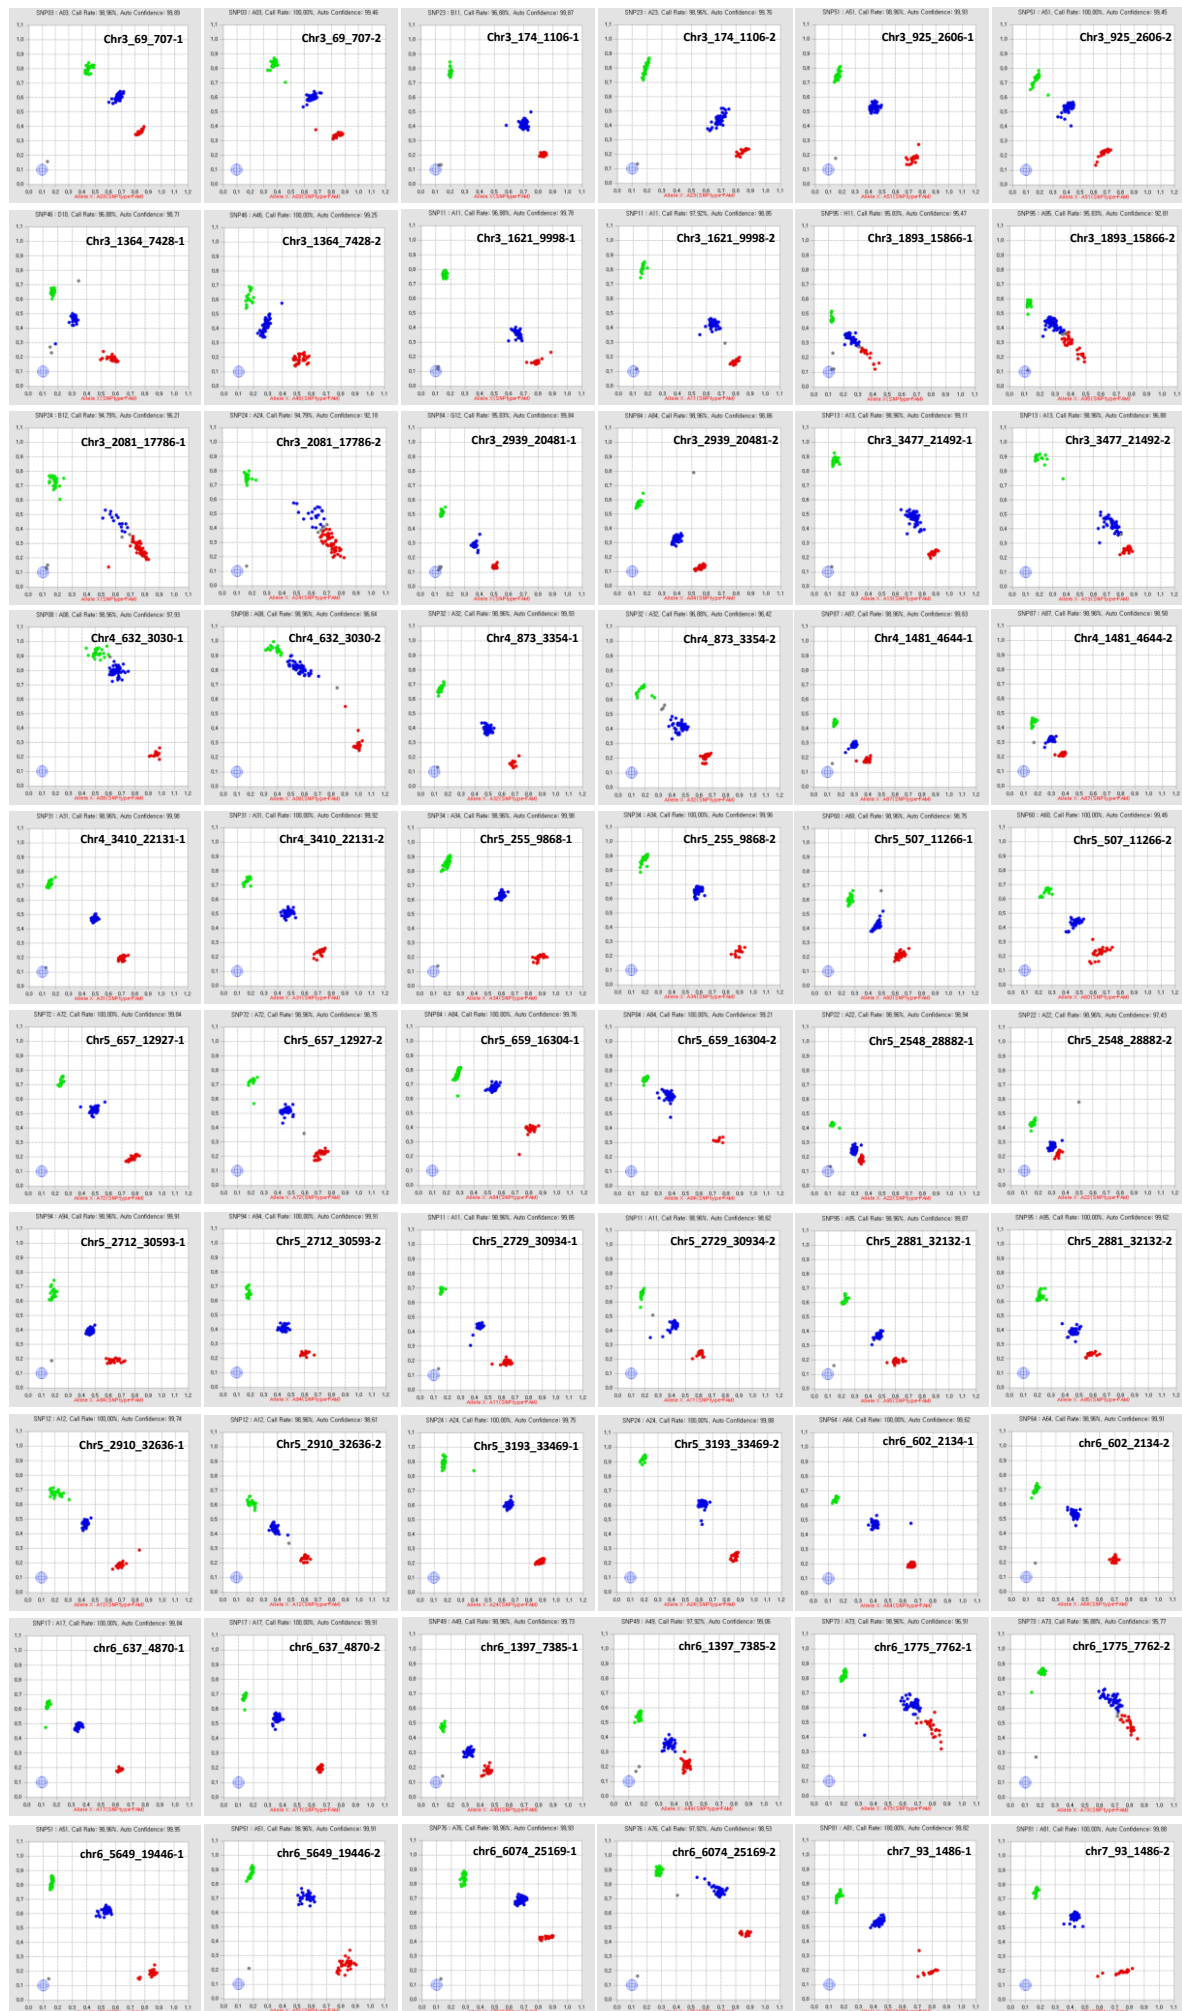

Figure S2. *Cont.*

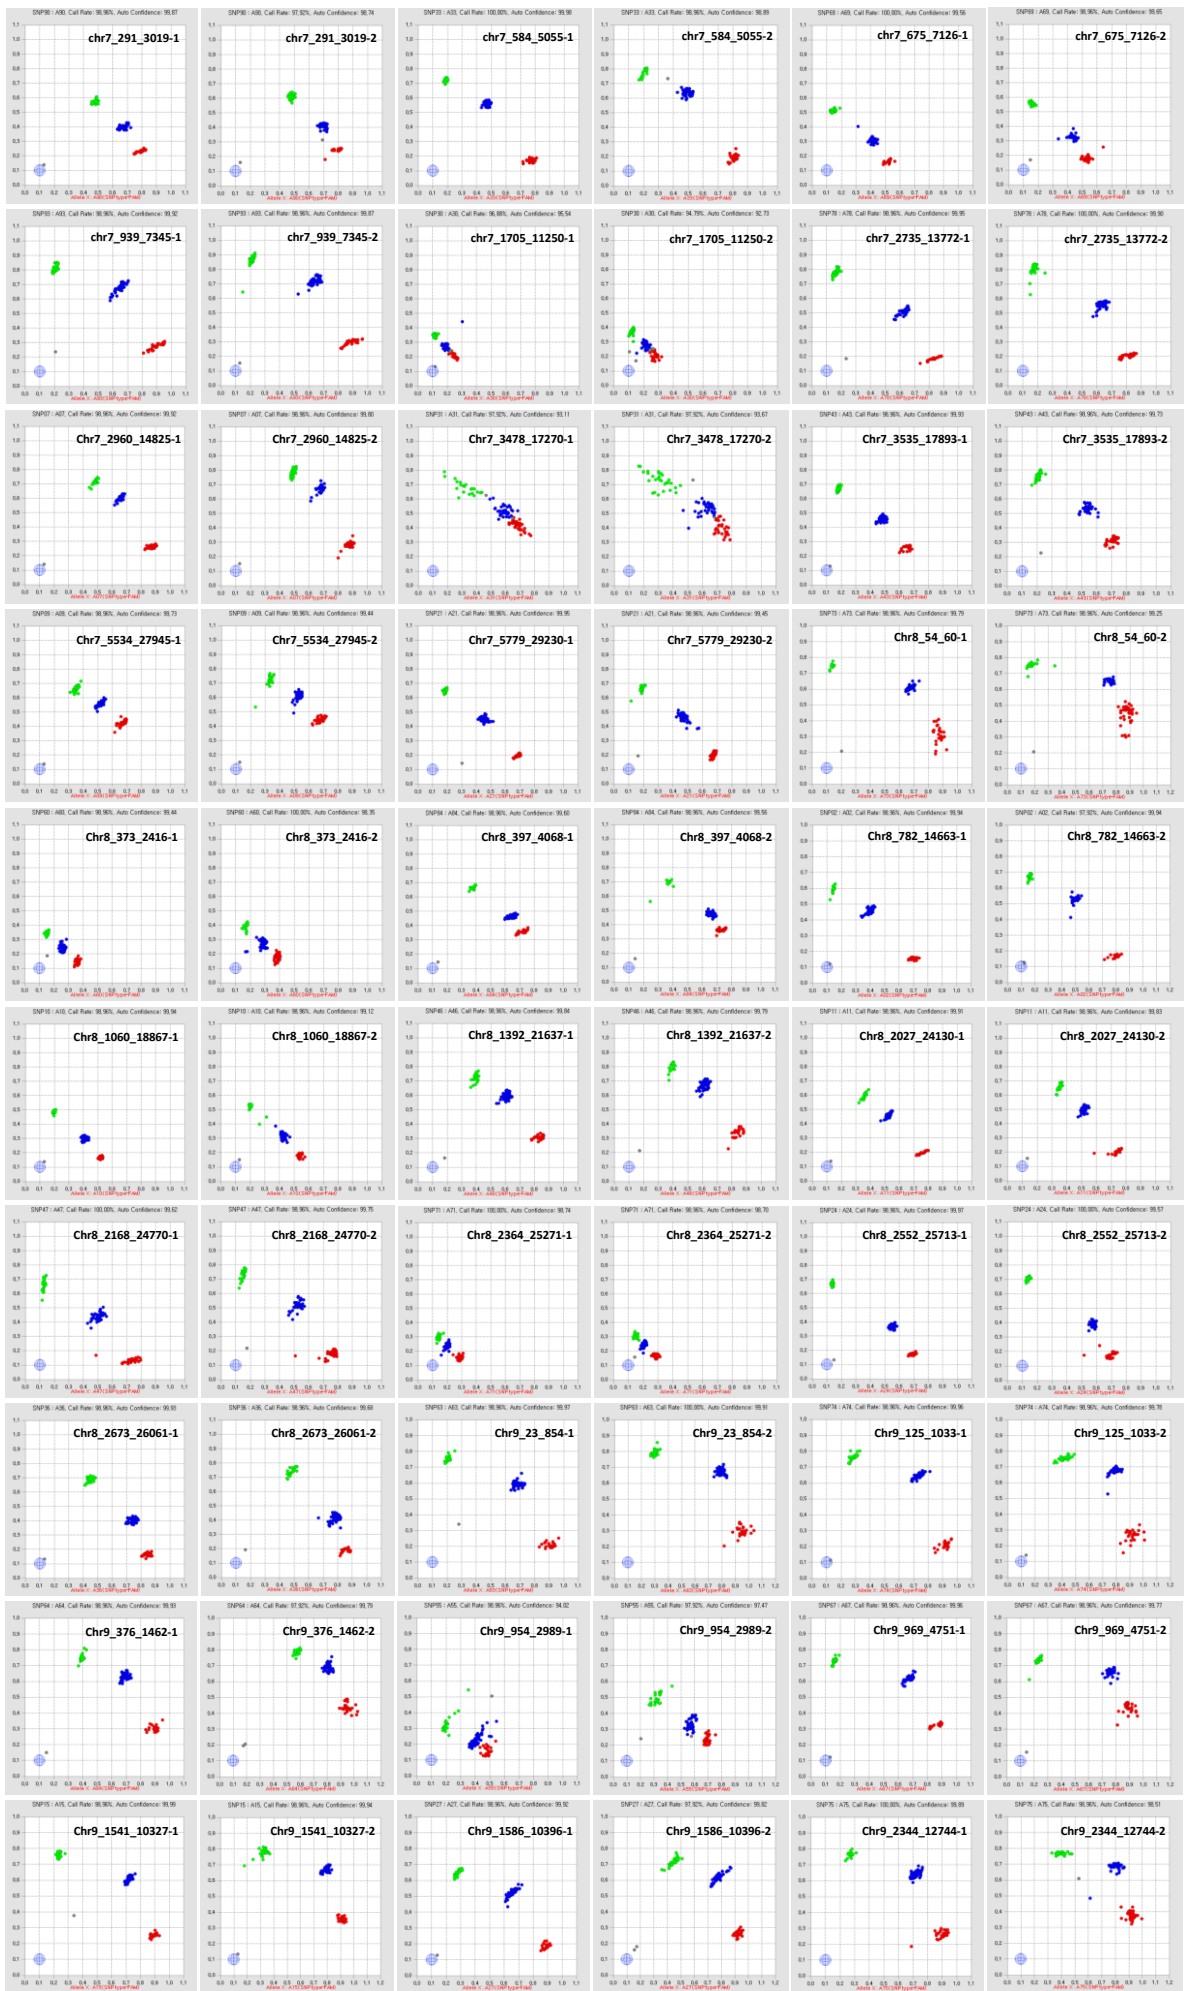

Figure S2. *Cont.*



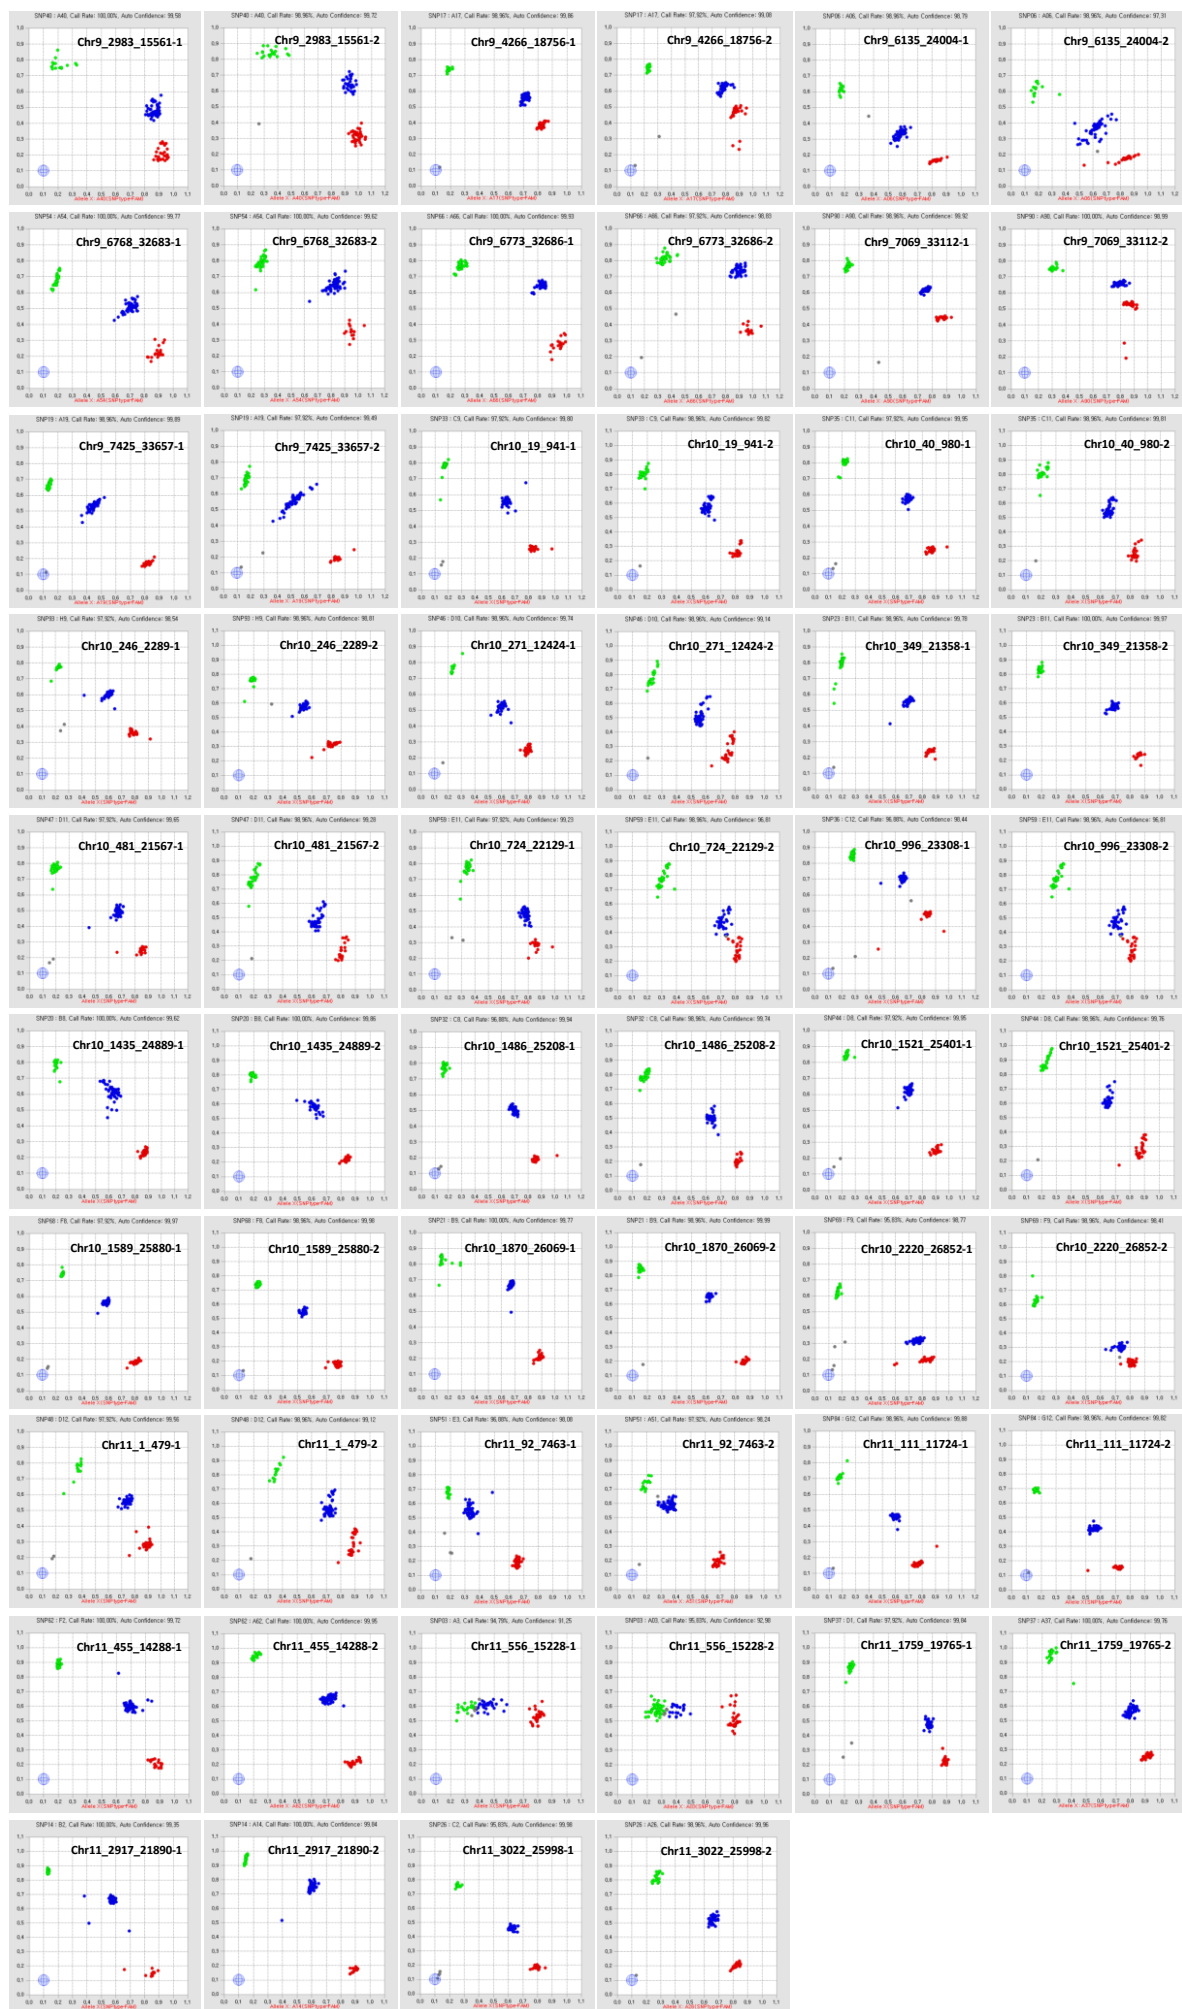

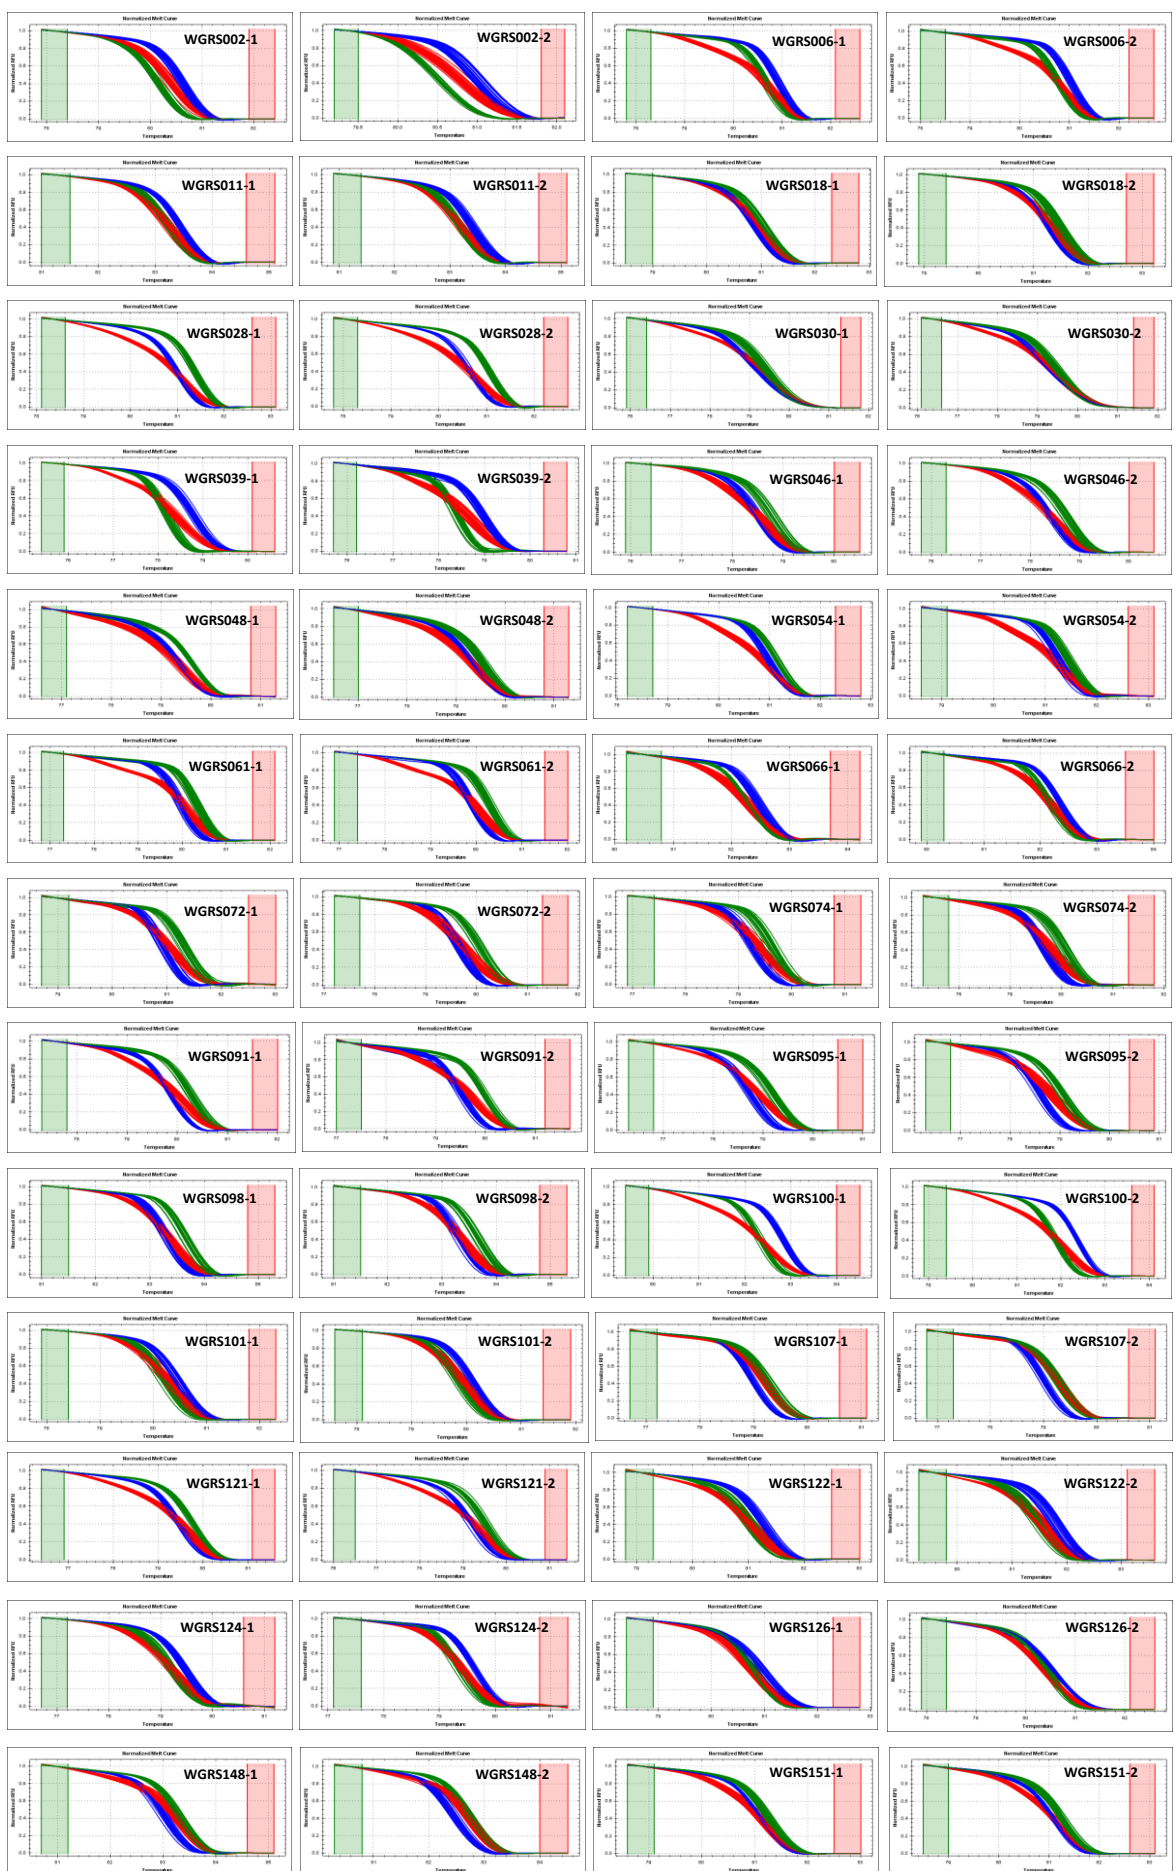

**Figure S3.** Melting curves of 88 polymorphic HRM markers for two parents,  $F_1$ , and 178 individuals of the  $F_2$  population. WGRS002-1 and WGRS002-2 represent melting curves of a WGRS002 HRM marker for  $F_2$  individuals from 1 to 89 and from 90 to 178, respectively.

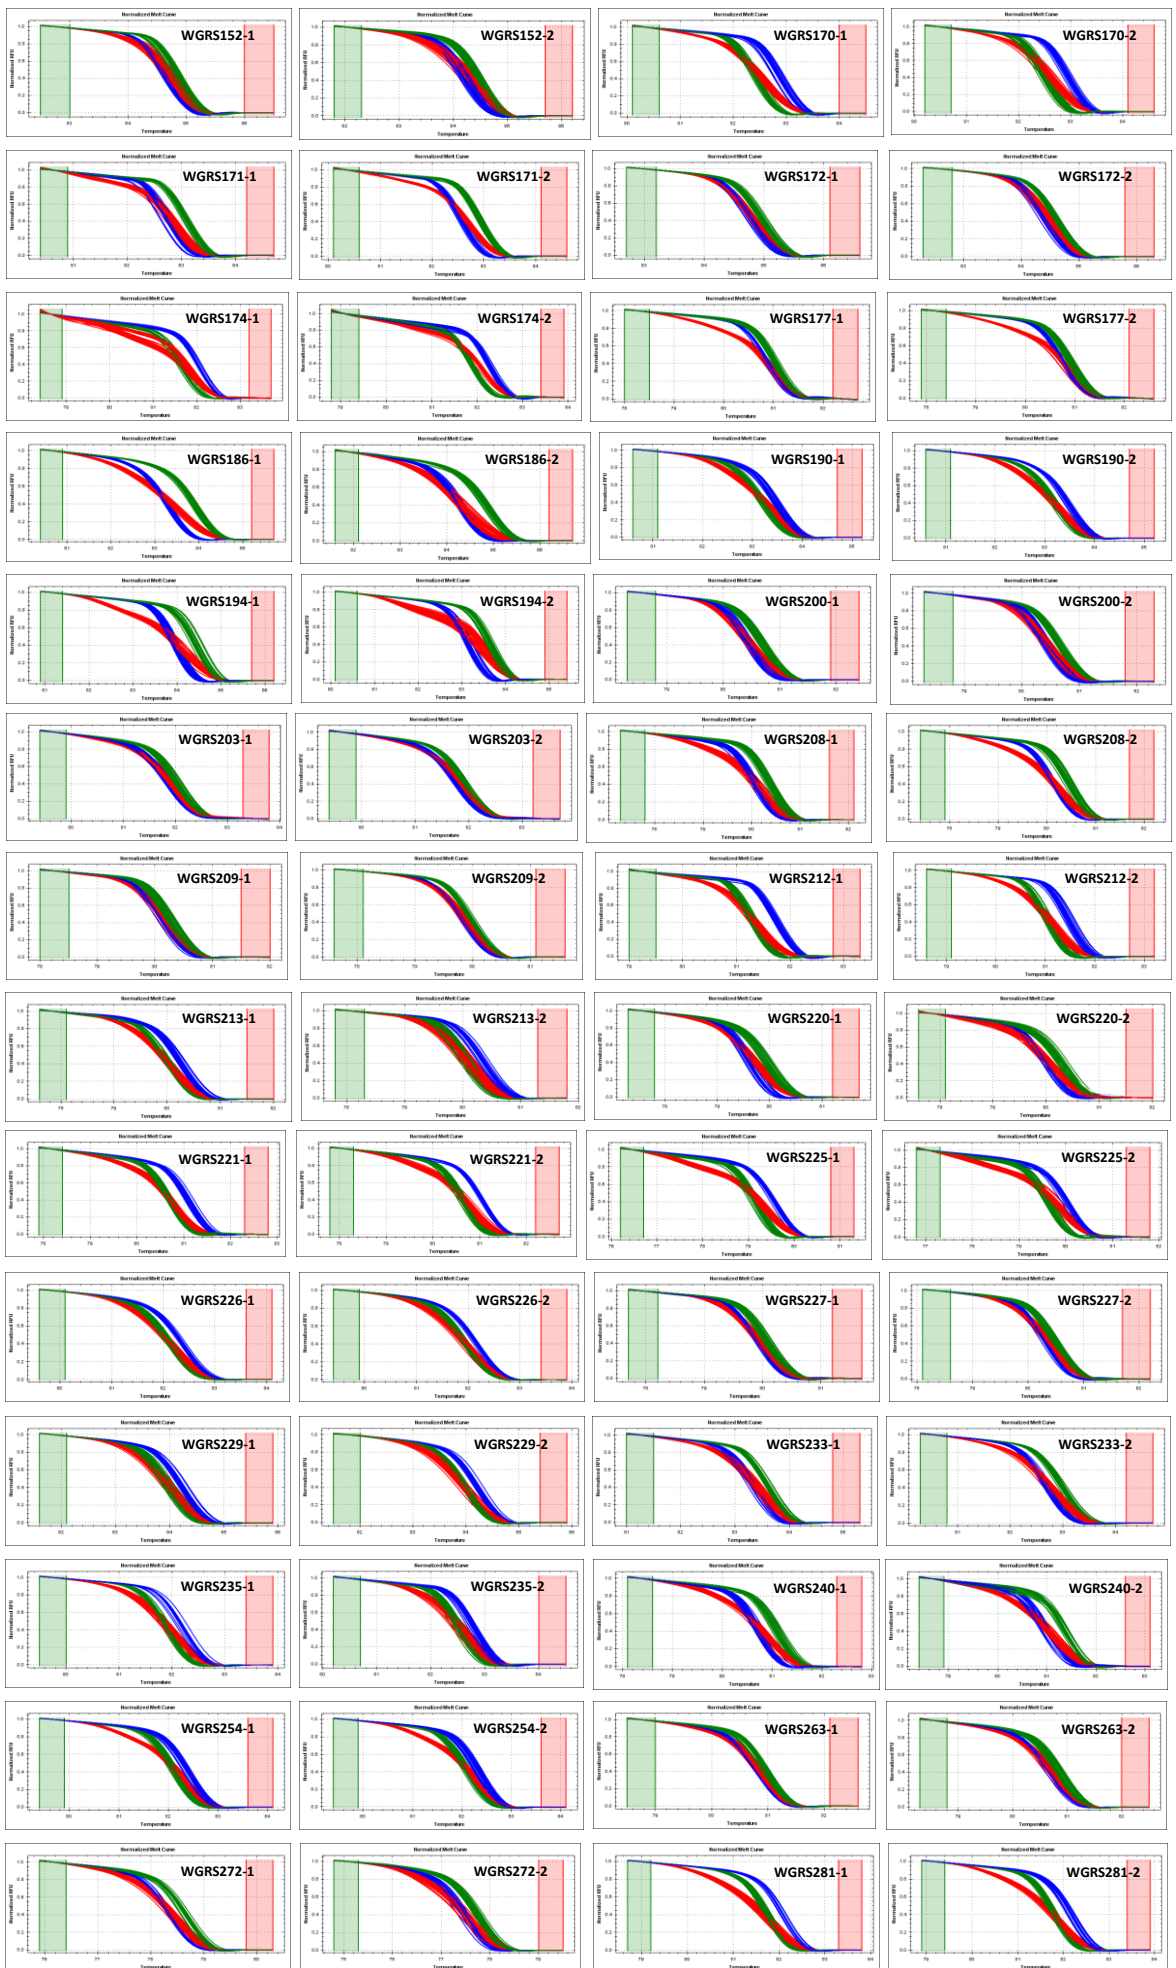

Figure S3. Cont.



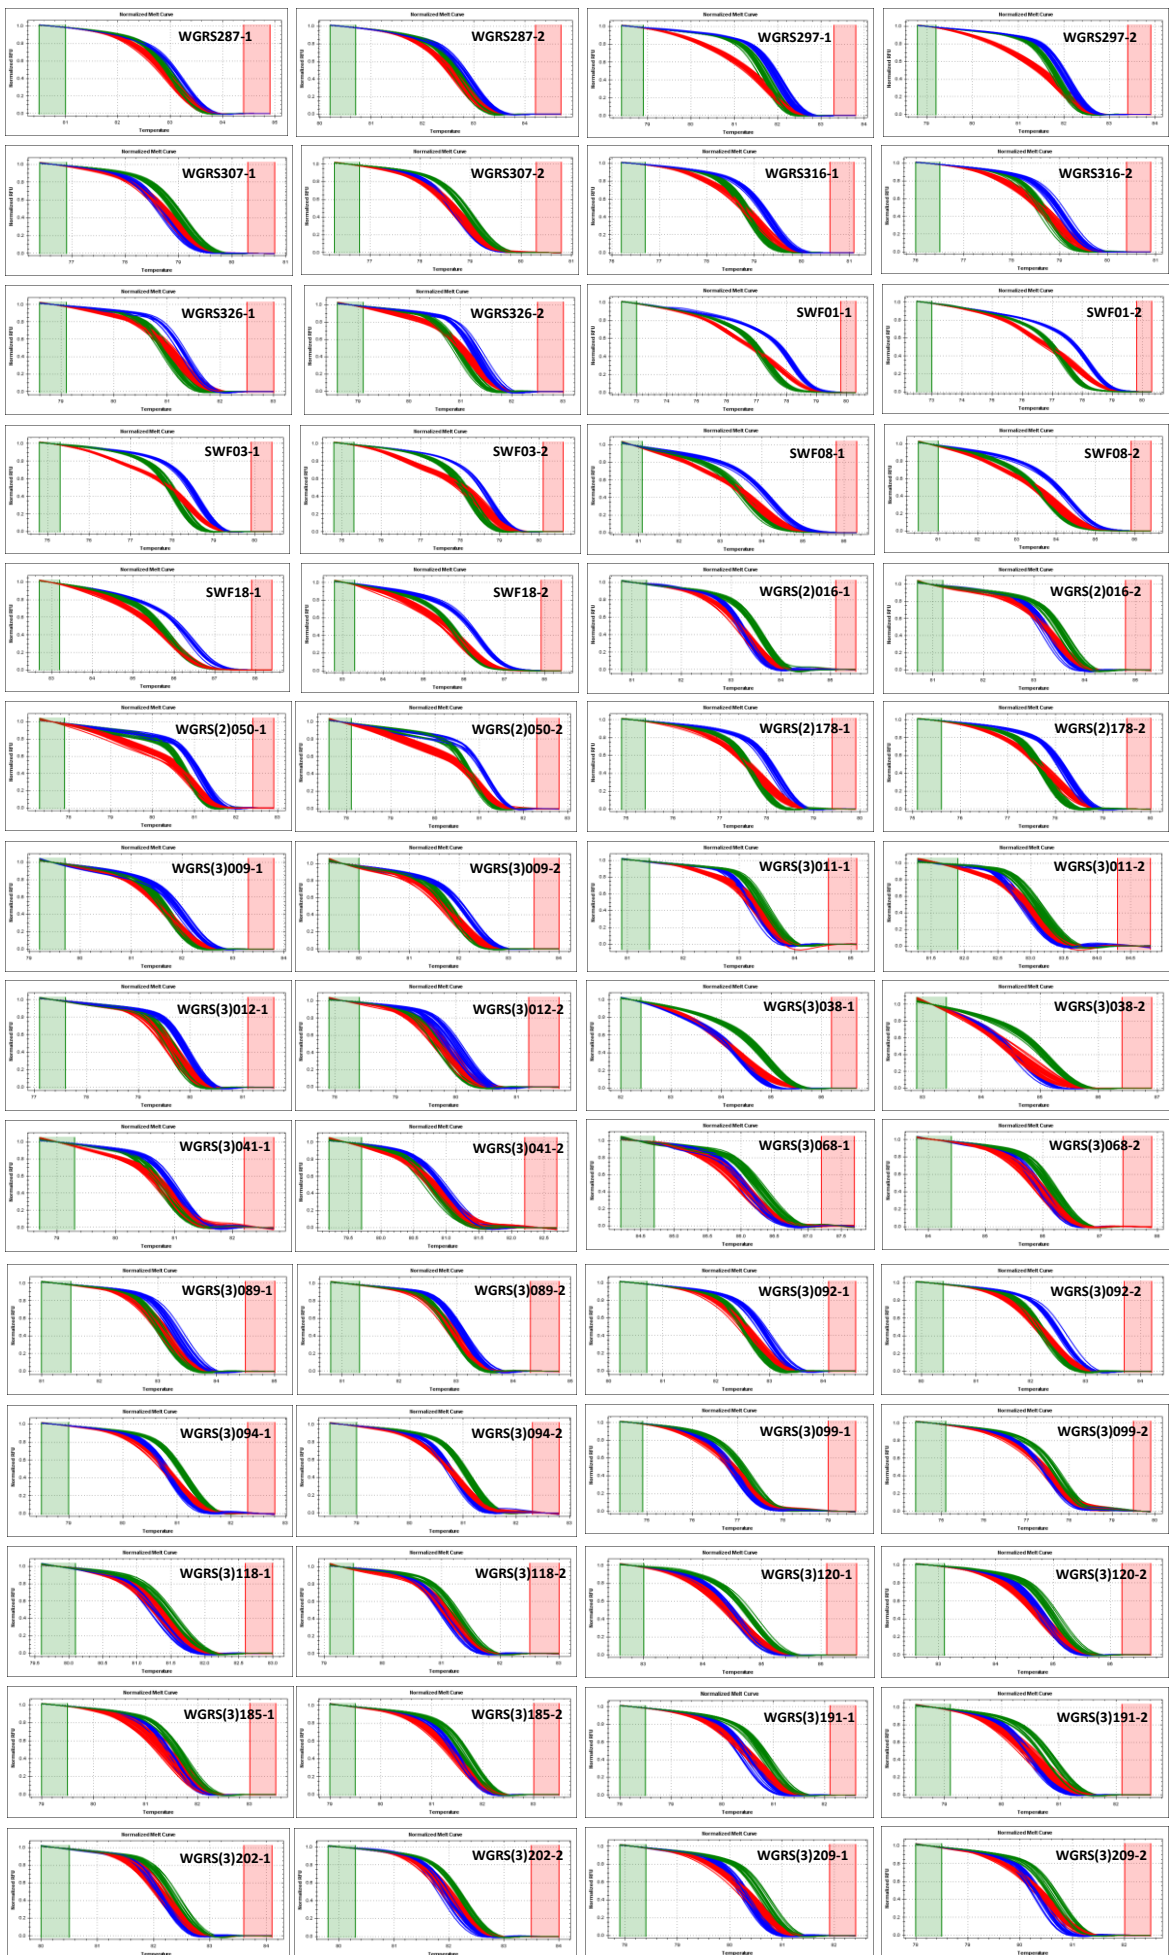

Figure S3. Cont.

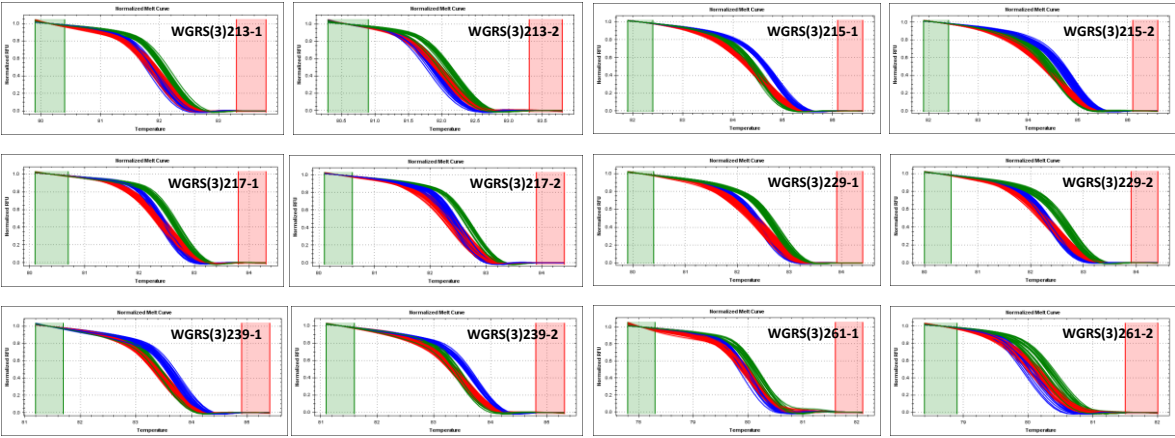

Figure S3. *Cont.*

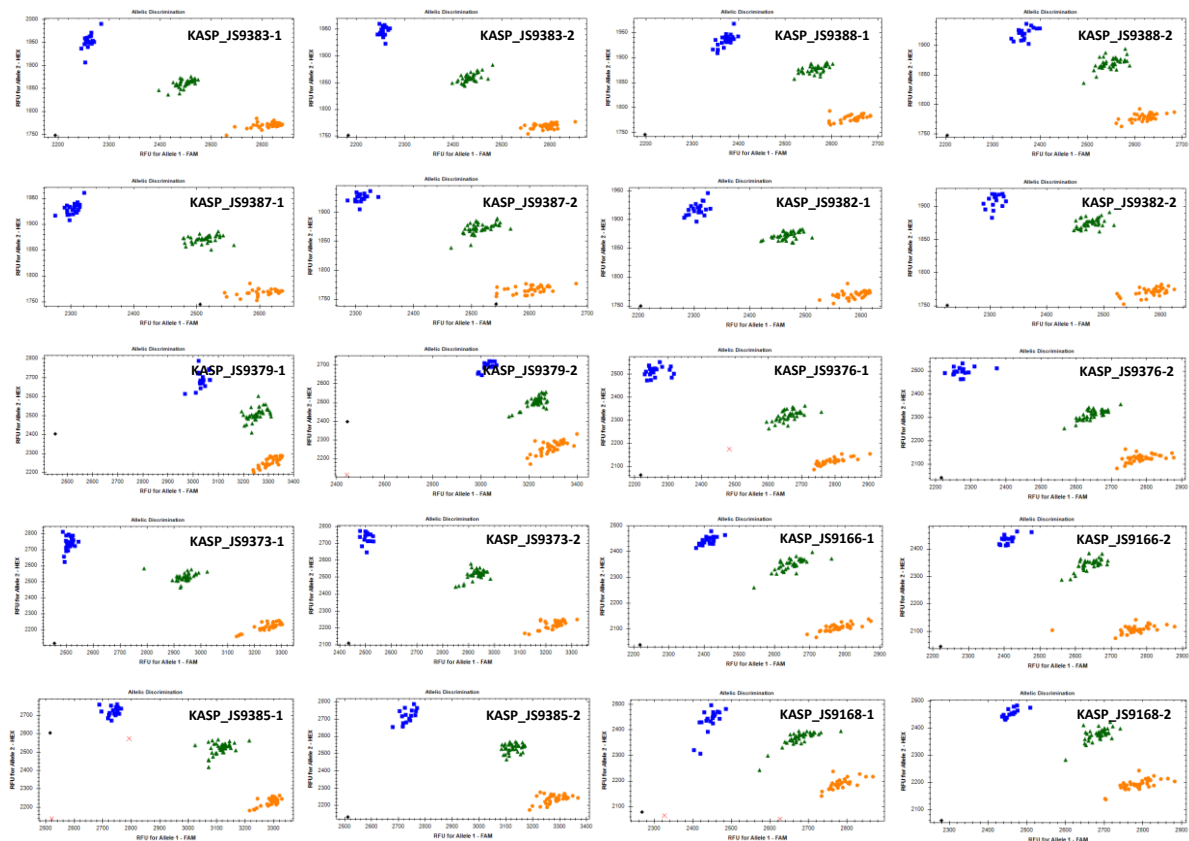

**Figure S4.** SNP genotyping of KASPTM markers for two parents,  $F_1$ , 178 individuals of the  $F_2$  population. Genotyping of previously reported 10 KASP makers to construct a genetic linkage map. KASP\_JS9383-1 and KASP\_JS9383-2 represent scatter plotting of a KASP\_JS9383 marker for  $F_2$  individuals from 1 to 89 and from 90 to 178, respectively.

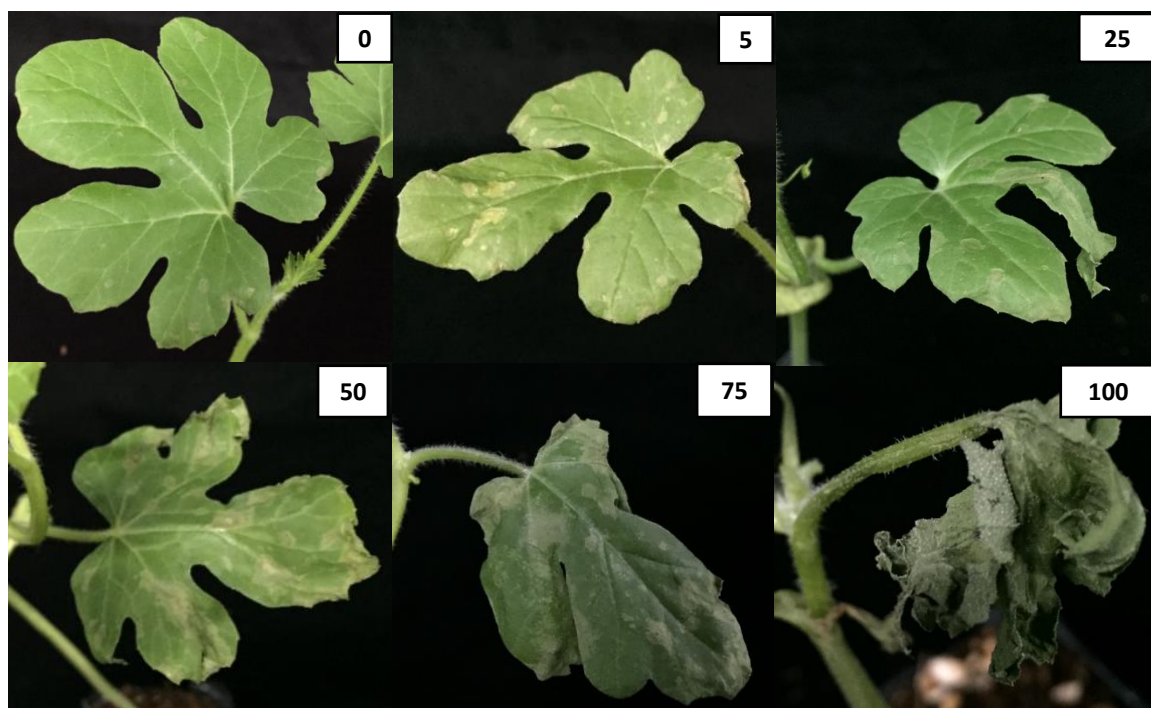

**Figure S5.** Evaluation of disease severity using leaf lesion (LL) area. The leaf lesion (%) was measured by calculating the ratio of GSB lesion area to the total leaf area on infected plants. Where 0, no leaf lesion; 5, 5% leaf lesion; 25, 25% leaf lesion; 50, 50% leaf lesion; 75, 75% leaf lesion; 100, 100% leaf lesion.



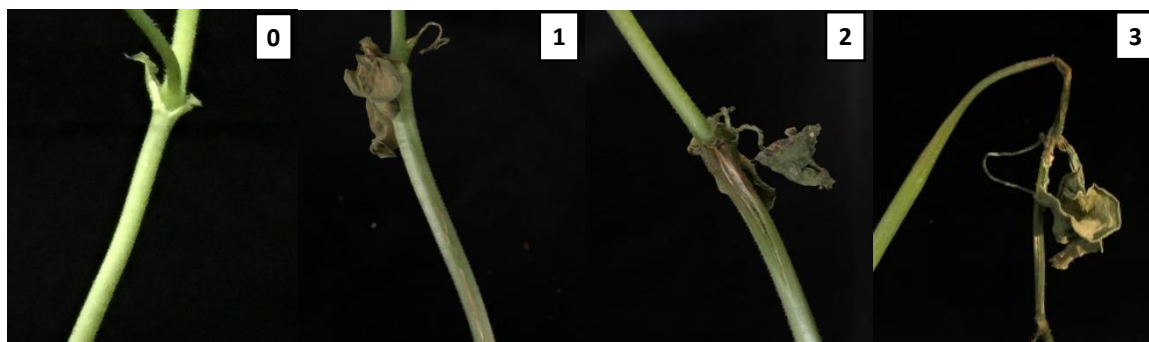

**Figure S6.** Symptoms caused by *Didymella bryoniae* on stem and petiole of test plants. Stem blight (SB) was scored at a scale of 0-3: Where 0, no symptoms; 1, moderate symptoms; 2, slight necrosis; 3, severe blight symptoms.
